# Supplementary material for: Resource Allocation for Maximizing Prediction Accuracy and Genetic Gain of Genomic Selection in Plant Breeding: A Simulation Experiment
Source: PubMed Central journal article supplement (PMC3583455; doi:10.1534/g3.112.004911), 2013-03-01
Supplement: supp_3.3.481_004911SI.pdf [file supp_3.3.481_004911SI.pdf]

**Resource allocation for maximizing prediction accuracy and genetic gain of genomic selection in plant breeding: A simulation experiment**

Aaron J. Lorenz

Department of Agronomy and Horticulture, University of Nebraska, Lincoln, NE 68583

DOI: [10.1534/g3.112.004911](https://doi.org/10.1534/g3.112.004911)

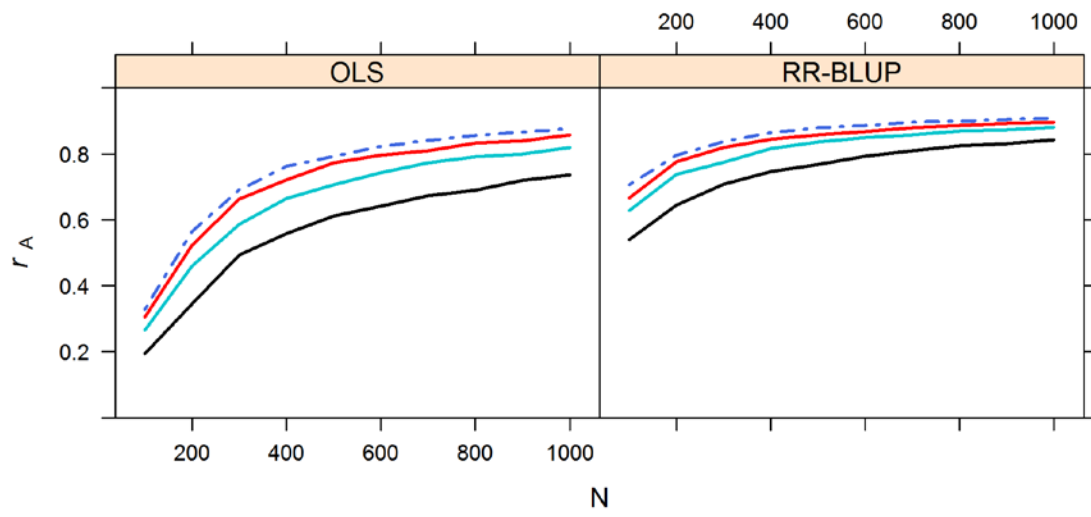

**Figure S1** Prediction accuracy ( $r_A$ ) as a function of replication number and population size for each of two statistical models. Black = 1 rep, Teal = 2 reps, Red = 3 reps, Dashed blue = 4 reps.

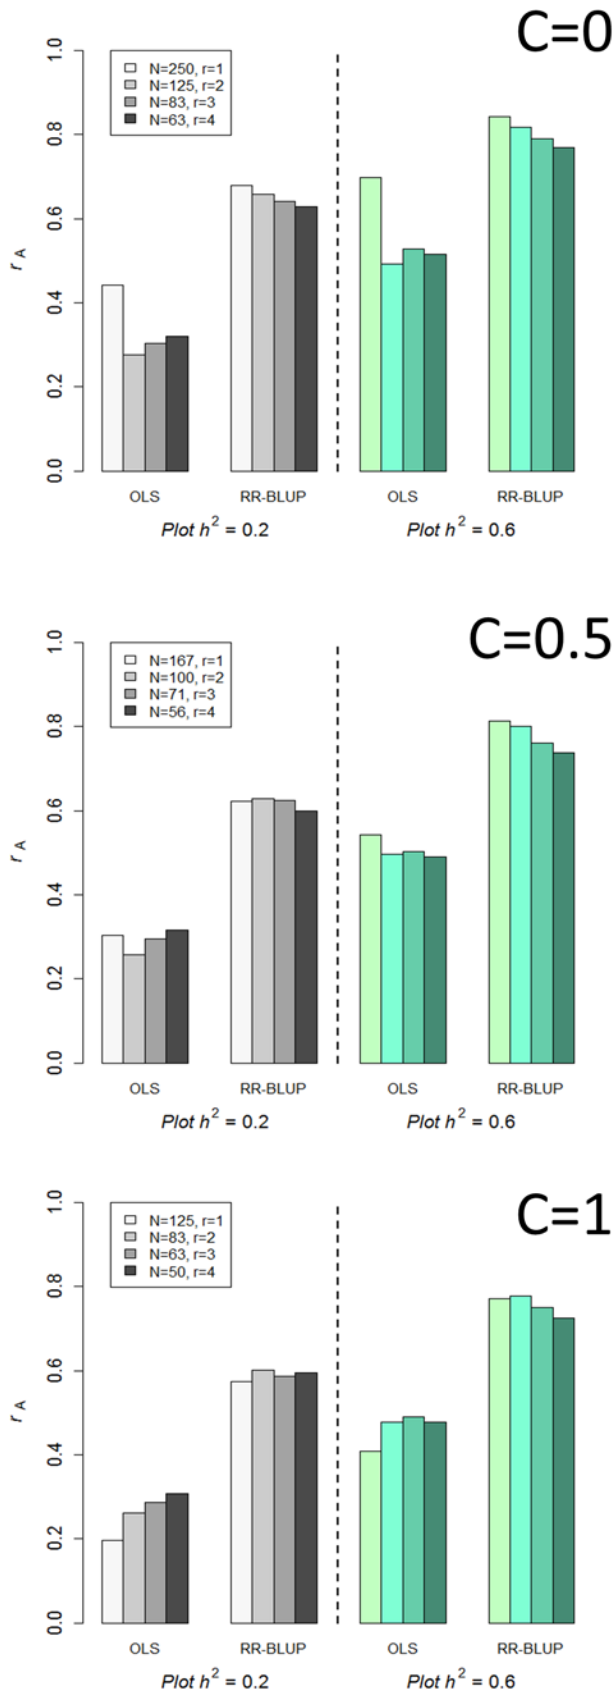

**Figure S2** Prediction accuracy ( $r_A$ ) for two statistical models as affected by tradeoffs between replication ( $r$ ) and population size ( $n$ ) for various levels of relative genotyping costs ( $C$ ) expressed in field plot equivalents. Total budget is set to 250 field plot equivalents.

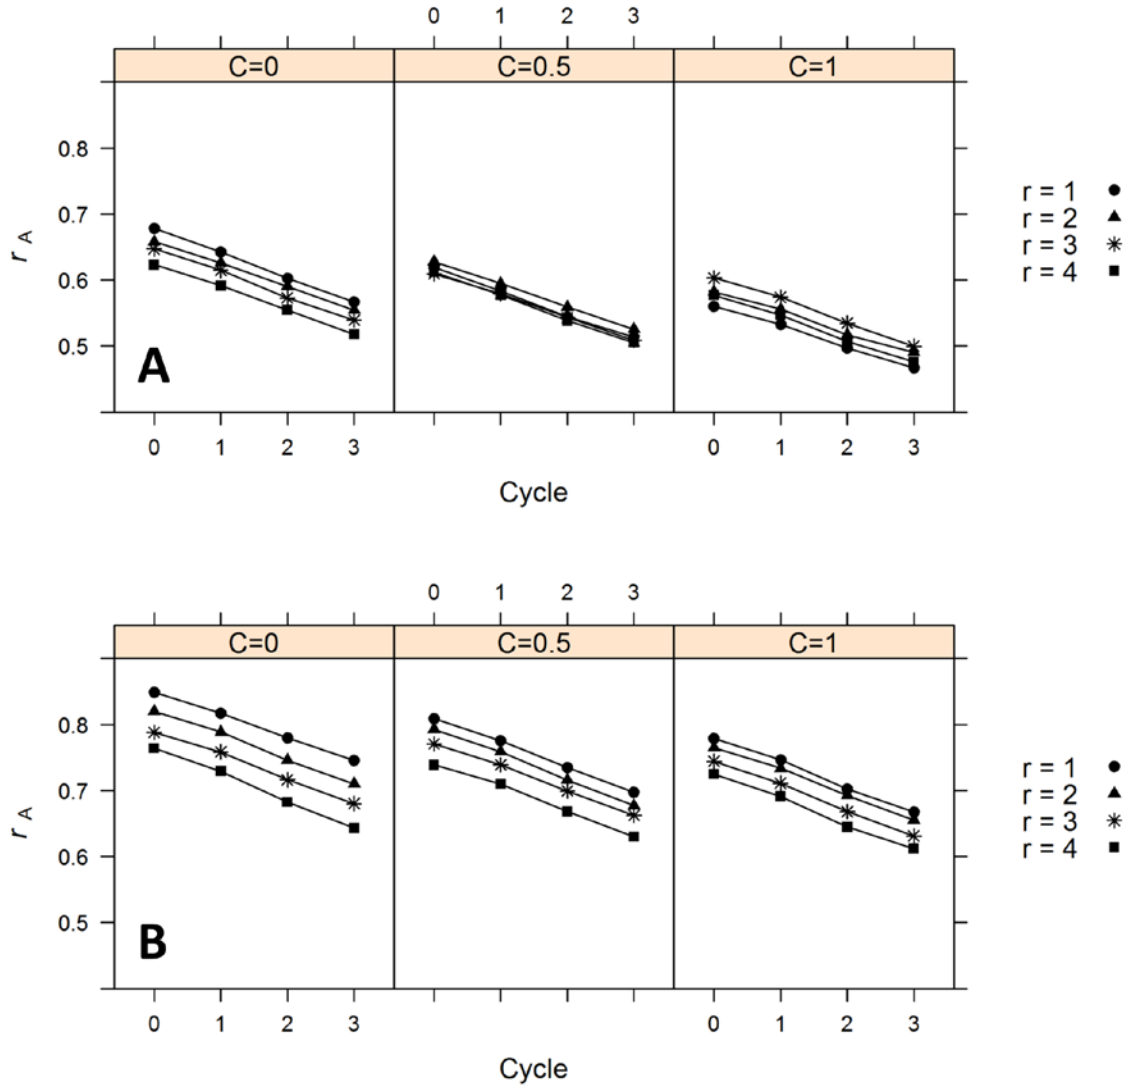

**Figure S3** Prediction accuracy ( $r_A$ ) for each relative genotyping cost and resource allocation strategy across generations of random mating (Cycle). Population sizes corresponding to each level of  $r$  can be observed in Figure 2. Total budget was set to 250 field plot equivalents. Panel A: Heritability of single plot measurements set to 0.20. Panel B: Heritability of single plot measurements set to 0.60. Average standard error of prediction accuracies was 0.006 and ranged from 0.003 to 0.008.

**Files S1-S2**

**File S1: R script containing functions used in the simulation**

**File S2: User script executing the functions**

**Files S1-S2 are available for download at <http://www.g3journal.org/lookup/suppl/doi:10.1534/g3.112.004911/-/DC1>.**
