# Supplementary material for: Resource Allocation for Maximizing Prediction Accuracy and Genetic Gain of Genomic Selection in Plant Breeding: A Simulation Experiment
Source: PubMed Central journal article supplement (PMC3583455; doi:10.1534/g3.112.004911), 2013-03-01
Supplement: supp_3.3.481_FigureS1.pdf [file supp_3.3.481_FigureS1.pdf]

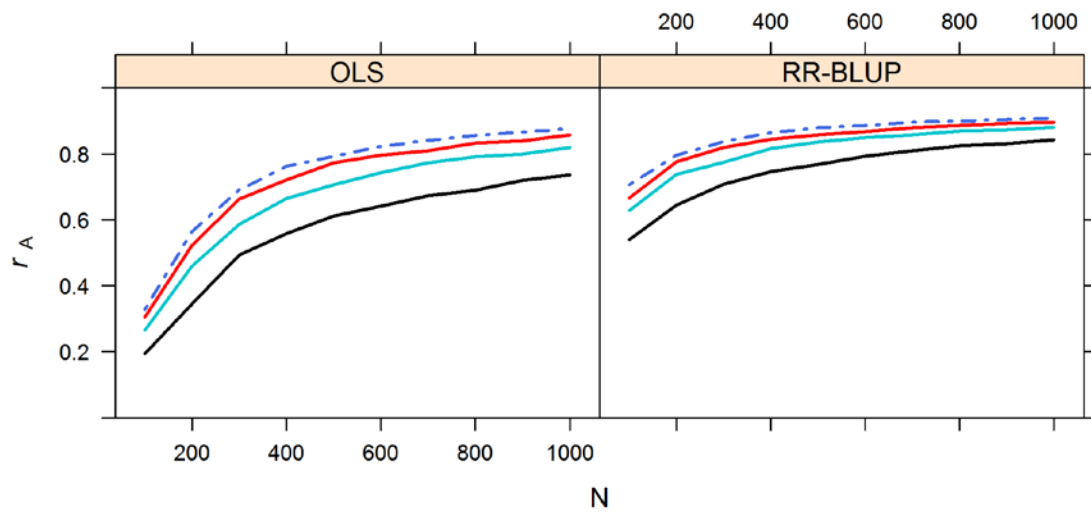

**Figure S1** Prediction accuracy ( $r_A$ ) as a function of replication number and population size for each of two statistical models. Black = 1 rep, Teal = 2 reps, Red = 3 reps, Dashed blue = 4 reps.
