# Supplementary material for: Resource Allocation for Maximizing Prediction Accuracy and Genetic Gain of Genomic Selection in Plant Breeding: A Simulation Experiment
Source: PubMed Central journal article supplement (PMC3583455; doi:10.1534/g3.112.004911), 2013-03-01
Supplement: supp_3.3.481_FigureS2.pdf [file supp_3.3.481_FigureS2.pdf]

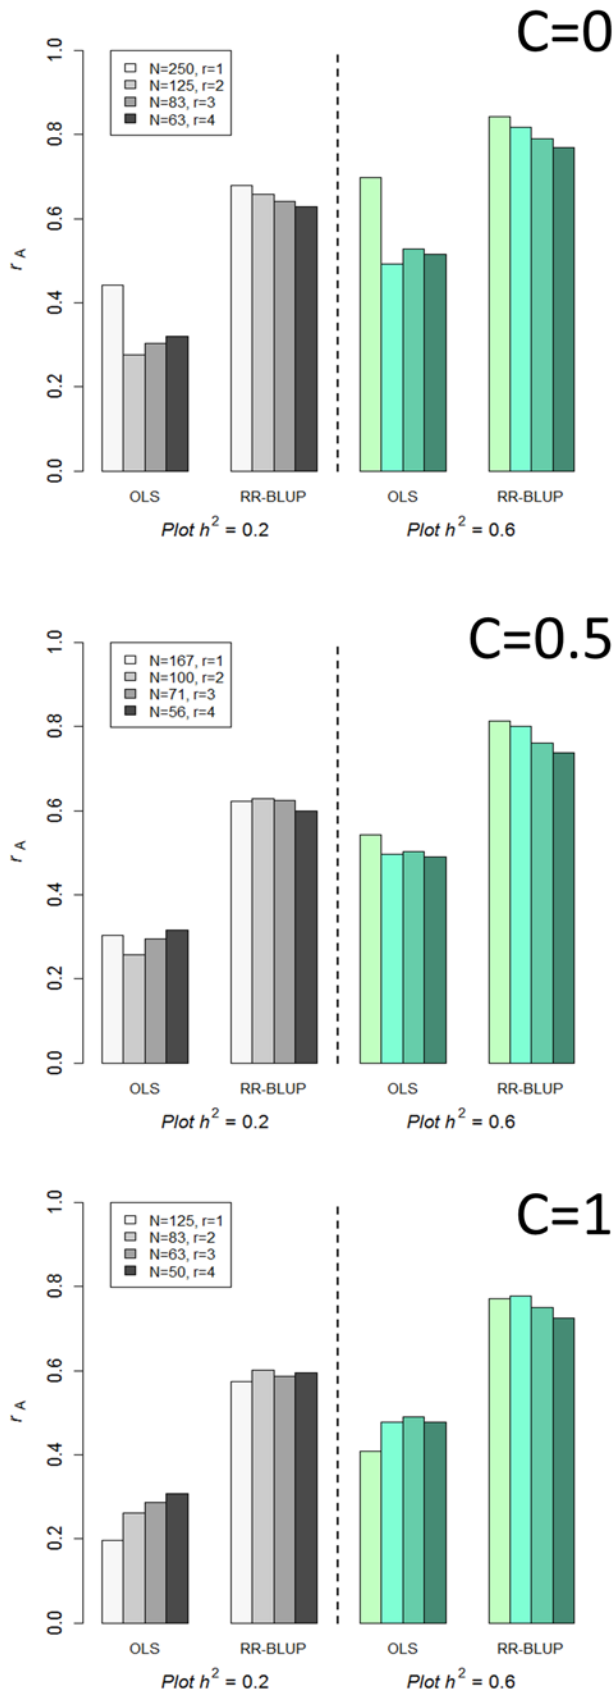

**Figure S2** Prediction accuracy ( $r_A$ ) for two statistical models as affected by tradeoffs between replication ( $r$ ) and population size ( $n$ ) for various levels of relative genotyping costs ( $C$ ) expressed in field plot equivalents. Total budget is set to 250 field plot equivalents.
